# Supplementary material for: Correlation of Phosphorus Adsorption with Chemical Properties of Aluminum-Based Drinking Water Treatment Residuals Collected from Various Parts of the United States
Source: MDPI journal article supplement (doi:10.3390/molecules27217194), 2022-10-24
Supplement: s1 [file s1]

## Supplementary Data

### Correlation of Phosphorus Adsorption with Chemical Properties of Aluminum-Based Drinking Water Treatment Residuals Collected from Various Parts of the United States

Roxana Rahmati, Virinder Sidhu, Rosita Nunez, Rupali Datta, Dibyendu Sarkar

Table S1. Total metal(loid) concentrations of Al-WTRs

|    | As      | Pb   | Cd   | Cr   | Cu   | Ni               | Zn   | Al     | Fe     |
|----|---------|------|------|------|------|------------------|------|--------|--------|
|    | (mg/kg) |      |      |      |      |                  |      | (mg/g) |        |
| NJ | 19.9    | 17.4 | 0.43 | 22.1 | 59   | 15.7             | 101  | 158.49 | 14.07  |
| MO | 76.3    | 14   | 0.55 | 36.5 | 35.1 | 32.6             | 84.6 | 66.97  | 37.80  |
| SD | 4.67    | 2.99 | 0.06 | 0.42 | 5.60 | 4.81             | 19.7 | 3.60   | 27.17  |
| NY | 27.5    | 17.8 | 0.61 | 26   | 33.1 | 30.7             | 90.6 | 99.69  | 28.08  |
| FL | 7.65    | 3.49 | 0.05 | BDL  | 2.0  | BDL <sup>1</sup> | 7.37 | 0.62   | 8.20   |
| OK | 3.37    | 4.52 | 0.19 | 9.66 | 7.91 | 9.22             | 25.6 | 11.55  | 145.04 |
| NE | 20.3    | 2.27 | 0.15 | BDL  | 6.41 | 3.66             | 2.91 | 2.22   | 125.33 |
| KY | 17.3    | 5.65 | 0.24 | 14.1 | 75.8 | 16.6             | 86.8 | 112.30 | 12.92  |
| ME | 7.15    | 8.89 | 0.29 | 11.5 | 106  | 4.74             | 50.3 | 174.06 | 18.16  |
| CA | 111     | 3.73 | 0.16 | 31.2 | 39.5 | 17.4             | 68.8 | 203.32 | 8.02   |
| NC | 4.75    | 14.8 | 0.55 | 44.4 | 37.9 | 20.5             | 103  | 222.98 | 88.95  |
| MA | 28.5    | 7.45 | 1.99 | 125  | 94.5 | 29               | 82.5 | 193.04 | 30.96  |
| CT | 6.49    | 3.72 | 0.17 | 162  | 116  | 4.81             | 60.1 | 193.63 | 7.97   |

<sup>1</sup>Below detection limit

Table S2. Synthetic Precipitation Leaching Procedure (SPLP) values of Al-WTRs (all units are mg/L)

[illegible]

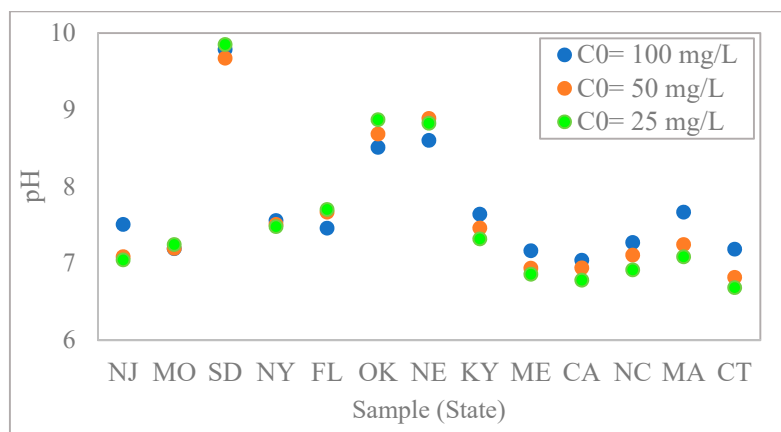

Figure S1. Final pH after adsorption experiment
